# Supplementary material for: Modeling the spatial structure of the endemic mara (Dolichotis patagonum) across modified landscapes
Source: PeerJ. 2019 Feb 12;7:e6367. doi: 10.7717/peerj.6367 (PMC6376934; doi:10.7717/peerj.6367)
Supplement: Supplemental Information 7 — Location and variables that define each segment. [file peerj-07-6367-s007.xlsx]

## Sheet: Hoja1
Segment.Label	Transect.Label	Effort	x	y	sheep_stock	CV_DEM	CV_NDVI	ranch_dist	Mean_NDVI
212_17	24_17	1800	4.43e+06	5.27583e+06	53.0507	96	21.4302	72.27	0.14266
31_17	6_17	1800	4.42731e+06	5.27962e+06	41.4852	96	4.84868	2661.72	0.13318
30_17	6_17	1800	4.42875e+06	5.27846e+06	35.3635	96	29.9574	956.72	0.103198
211_17	24_17	1800	4.43179e+06	5.27576e+06	66.6139	96.4583	7.9151	1745.76	0.145339
101_15	26_15	1800	4.41455e+06	5.30456e+06	0	70.4584	17	1624.88	0.142394
101_16	26_16	1800	4.41455e+06	5.30456e+06	0	70.4584	17	1624.88	0.142394
190_15	6_15	1800	4.42637e+06	5.28109e+06	41.4852	67.5104	13	4399.15	0.136121
190_16	6_16	1800	4.42637e+06	5.28109e+06	41.4852	67.5104	13	4399.15	0.136121
162_17	6_17	1800	4.42644e+06	5.28112e+06	46.3685	67.5104	1.95291	4381.97	0.136121
60_16	46_16	1800	4.40149e+06	5.32616e+06	0	60.2609	16.1913	11100.3	0.145684
55_17	46_17	1800	4.39831e+06	5.32462e+06	0	59.69	15.2213	14264.1	0.154549
210_17	24_17	1800	4.4335e+06	5.27521e+06	66.6139	57.7876	6.48224	659.47	0.143895
131_17	44_17	1800	4.43493e+06	5.27794e+06	31.2492	56.6945	4.42901	3671.72	0.149717
94_17	366_17	1800	4.41456e+06	5.30455e+06	0	51.6388	16.6814	1628.78	0.142394
55_15	22_15	1800	4.44283e+06	5.31975e+06	37.0581	51.4739	14	5517.18	0.163218
56_15	22_15	1800	4.44106e+06	5.3198e+06	37.0581	51.4739	15	3756.55	0.165493
55_16	22_16	1800	4.44283e+06	5.31975e+06	37.0581	51.4739	14	5517.18	0.163218
56_16	22_16	1800	4.44106e+06	5.3198e+06	37.0581	51.4739	15	3756.55	0.165493
97_17	12_17	1800	4.39891e+06	5.27255e+06	0	49.0665	12.3155	8323.87	0.130766
56_17	46_17	1800	4.39981e+06	5.32554e+06	0	47.344	25.3862	12751.3	0.155434
52_17	22_17	1800	4.44284e+06	5.31974e+06	37.0581	46.3668	7.03255	5533.94	0.163218
218_17	366_17	1800	4.41513e+06	5.30625e+06	0	46.3187	8.18341	3169.99	0.133303
24_15	49_15	1800	4.41601e+06	5.30074e+06	30.7182	45.7475	16	790	0.145238
24_16	49_16	1800	4.41601e+06	5.30074e+06	30.7182	45.7475	16	790	0.145238
22_17	49_17	1800	4.41755e+06	5.29992e+06	23.2416	44.6729	3.42913	1012.14	0.13519
58_15	46_15	1800	4.39841e+06	5.32462e+06	0	43.4076	13	14172.7	0.154549
59_15	46_15	1800	4.39987e+06	5.32546e+06	0	43.4076	14	12692.8	0.155434
58_16	46_16	1800	4.39841e+06	5.32462e+06	0	43.4076	13	14172.7	0.154549
59_16	46_16	1800	4.39987e+06	5.32546e+06	0	43.4076	14	12692.8	0.155434
21_17	49_17	1800	4.41603e+06	5.30079e+06	30.7182	43.2677	6.26944	784.95	0.145238
91_17	19_17	1800	4.44084e+06	5.32819e+06	6.9276	41.6446	6.59306	8757.09	0.159632
154_15	44_15	1800	4.43492e+06	5.27796e+06	31.2492	40.6746	14	3689.8	0.149717
154_16	44_16	1800	4.43492e+06	5.27796e+06	31.2492	40.6746	14	3689.8	0.149717
19_17	366_17	1800	4.41638e+06	5.30758e+06	0	40.466	5.07276	4992.56	0.132141
23_17	49_17	1800	4.41886e+06	5.2987e+06	23.2416	40.4147	3.95756	2800.17	0.135521
58_17	46_17	1800	4.40318e+06	5.32674e+06	0	39.8548	31.9991	9488.09	0.153293
76_15	54_15	1800	4.43649e+06	5.34054e+06	13.8552	39.6543	20	4217.23	0.169253
76_16	54_16	1800	4.43649e+06	5.34054e+06	13.8552	39.6543	20	4217.23	0.169253
61_15	46_15	1800	4.40318e+06	5.32678e+06	0	38.4666	15	9495.58	0.153293
61_16	46_16	1800	4.40318e+06	5.32678e+06	0	38.4666	15	9495.58	0.153293
59_17	46_17	1800	4.40494e+06	5.32702e+06	0	37.1292	21.8225	7802.47	0.148323
73_17	54_17	1800	4.43654e+06	5.34061e+06	13.8552	35.2824	12.508	4242.95	0.169253
45_17	55_17	1800	4.44502e+06	5.30302e+06	0	35.1253	3.38808	2651.25	0.168982
57_17	46_17	1800	4.40149e+06	5.32616e+06	0	34.9931	35.6917	11102.6	0.145684
21_15	9_15	1800	4.44647e+06	5.26804e+06	64.1437	34.6952	11	1972.41	0.166091
21_16	9_16	1800	4.44647e+06	5.26804e+06	64.1437	34.6952	11	1972.41	0.166091
63_15	46_15	1800	4.40666e+06	5.32724e+06	0	34.663	17	6202.95	0.161107
64_15	46_15	1800	4.40843e+06	5.32713e+06	10.9537	34.663	18	4502.53	0.175959
63_16	46_16	1800	4.40666e+06	5.32724e+06	0	34.663	17	6202.95	0.161107
64_16	46_16	1800	4.40843e+06	5.32713e+06	10.9537	34.663	18	4502.53	0.175959
96_15	19_15	1800	4.44085e+06	5.3282e+06	6.9276	34.1298	14	8765.43	0.159632
96_16	19_16	1800	4.44085e+06	5.3282e+06	6.9276	34.1298	14	8765.43	0.159632
179_15	49_15	1800	4.41425e+06	5.30106e+06	35.9956	33.4373	16	2583.52	0.14661
179_16	49_16	1800	4.41425e+06	5.30106e+06	35.9956	33.4373	16	2583.52	0.14661
23_15	366_15	1800	4.41762e+06	5.30888e+06	0	31.9272	17	6792	0.129806
22_15	366_15	1800	4.41638e+06	5.30758e+06	0	31.9272	18	4993.5	0.132141
23_16	366_16	1800	4.41762e+06	5.30888e+06	0	31.9272	17	6792	0.129806
22_16	366_16	1800	4.41638e+06	5.30758e+06	0	31.9272	18	4993.5	0.132141
25_15	49_15	1800	4.41757e+06	5.29992e+06	23.2416	30.5592	14	1021.1	0.13519
26_15	49_15	1800	4.41886e+06	5.2987e+06	23.2416	30.5592	14	2800.22	0.135521
25_16	49_16	1800	4.41757e+06	5.29992e+06	23.2416	30.5592	14	1021.1	0.13519
26_16	49_16	1800	4.41886e+06	5.2987e+06	23.2416	30.5592	14	2800.22	0.135521
152_17	49_17	1800	4.41425e+06	5.30108e+06	35.9956	29.8916	2.42743	2584.14	0.14661
153_17	49_17	1800	4.41245e+06	5.30115e+06	41.273	27.4949	3.83411	2740.98	0.151554
60_17	46_17	1800	4.40667e+06	5.32718e+06	0	25.2744	24.7245	6177.1	0.161107
209_17	24_17	1800	4.43479e+06	5.274e+06	34.5776	25.1695	4.71051	1406.12	0.148345
5003_16	NUEVA_5_16	1800	4.38298e+06	5.29726e+06	39.8732	25	19.3699	3119.75	0.144849
48_17	38_17	1800	4.44234e+06	5.3122e+06	19.5637	24.4218	4.60602	9415.3	0.180556
5004_16	NUEVA_5_16	1800	4.38119e+06	5.29738e+06	39.8732	24	18.3462	3112.04	0.151229
180_15	49_15	1800	4.41245e+06	5.30114e+06	41.273	23.6677	17	2749.12	0.151554
180_16	49_16	1800	4.41245e+06	5.30114e+06	41.273	23.6677	17	2749.12	0.151554
37_15	51_15	1800	4.42589e+06	5.28394e+06	45.285	23.5185	13	4063.06	0.135839
37_16	51_16	1800	4.42589e+06	5.28394e+06	45.285	23.5185	13	4063.06	0.135839
34_17	51_17	1800	4.42588e+06	5.28395e+06	45.285	23.5185	1.95291	4053.67	0.135839
108_15	56_15	1800	4.41404e+06	5.27491e+06	48.6571	21.7595	13	2278.47	0.15221
109_15	56_15	1800	4.41311e+06	5.27645e+06	63.0279	21.7595	14	2101.26	0.14842
108_16	56_16	1800	4.41404e+06	5.27491e+06	48.6571	21.7595	13	2278.47	0.15221
109_16	56_16	1800	4.41311e+06	5.27645e+06	63.0279	21.7595	14	2101.26	0.14842
52_16	38_16	1800	4.44076e+06	5.31297e+06	0	21.737	13	7983.49	0.177481
197_17	56_17	1800	4.4121e+06	5.27779e+06	70.2133	20.8335	3.60718	2386.77	0.154095
20_17	366_17	1800	4.41762e+06	5.30889e+06	0	20.7941	5.82522	6795.19	0.129806
141_15	35_15	1800	4.40377e+06	5.28029e+06	0	20.6781	13	3010.37	0.157225
141_16	35_16	1800	4.40377e+06	5.28029e+06	0	20.6781	13	3010.37	0.157225
57_15	22_15	1800	4.43931e+06	5.32007e+06	37.0581	20.5523	17	1983.06	0.176157
57_16	22_16	1800	4.43931e+06	5.32007e+06	37.0581	20.5523	17	1983.06	0.176157
49_16	38_16	1800	4.44408e+06	5.31226e+06	19.5637	20.4826	13	10400	0.172827
50_16	38_16	1800	4.44588e+06	5.31234e+06	19.5637	20.4826	13	11498.2	0.166809
51_16	38_16	1800	4.44228e+06	5.3122e+06	19.5637	20.4826	13	9391.37	0.180556
115_17	35_17	1800	4.4035e+06	5.27554e+06	0	20.2201	3.8366	5043.7	0.141542
30_15	50_15	1800	4.42094e+06	5.29633e+06	15.765	19.5146	14	5616.49	0.138025
30_16	50_16	1800	4.42094e+06	5.29633e+06	15.765	19.5146	14	5616.49	0.138025
81_17	110_17	1800	4.41027e+06	5.29949e+06	41.273	19.104	3.98648	3370.86	0.156166
47_17	38_17	1800	4.44587e+06	5.31235e+06	19.5637	18.8051	7.55672	11508.4	0.166809
107_15	56_15	1800	4.41542e+06	5.27384e+06	48.6571	18.7124	11	1918.42	0.149658
107_16	56_16	1800	4.41542e+06	5.27384e+06	48.6571	18.7124	11	1918.42	0.149658
62_15	46_15	1800	4.40493e+06	5.32697e+06	0	18.7011	16	7799.8	0.148323
62_16	46_16	1800	4.40493e+06	5.32697e+06	0	18.7011	16	7799.8	0.148323
179_17	NUEVA_2017_17	1800	4.382e+06	5.29732e+06	39.8732	18.3077	5.60602	2989.18	0.150947
49_17	38_17	1800	4.44069e+06	5.31288e+06	0	18.1304	2.7071	8029.06	0.177481
198_17	56_17	1800	4.41315e+06	5.27633e+06	63.0279	18.1074	5.83349	2095.51	0.148456
53_15	38_15	1800	4.43952e+06	5.31417e+06	0	17.8801	13	6395.31	0.176212
53_16	38_16	1800	4.43952e+06	5.31417e+06	0	17.8801	13	6395.31	0.176212
144_17	12_17	1800	4.4025e+06	5.27233e+06	0	17.5642	7.30212	7308.58	0.137539
110_15	56_15	1800	4.41204e+06	5.2779e+06	70.2133	17.0174	14	2464.29	0.15417
110_16	56_16	1800	4.41204e+06	5.2779e+06	70.2133	17.0174	14	2464.29	0.15417
118_17	35_17	1800	4.40366e+06	5.2802e+06	0	16.9709	7.9927	3087.34	0.157225
27_17	50_17	1800	4.42094e+06	5.29633e+06	15.765	16.8983	6.59155	5619.43	0.138025
126_15	17_15	1800	4.44598e+06	5.29974e+06	0	16.8928	14	1266.12	0.172516
126_16	17_16	1800	4.44598e+06	5.29974e+06	0	16.8928	14	1266.12	0.172516
157_17	551_17	1800	4.42284e+06	5.30982e+06	0	16.7557	6.25862	9181.95	0.143451
85_15	110_15	1800	4.41027e+06	5.29949e+06	41.273	16.6403	16	3370.84	0.156166
85_16	110_16	1800	4.41027e+06	5.29949e+06	41.273	16.6403	16	3370.84	0.156166
178_17	NUEVA_2017_17	1800	4.38021e+06	5.29745e+06	39.8732	16.5404	9.42182	3467.28	0.151222
138_15	35_15	1800	4.40347e+06	5.27556e+06	0	16.4565	11	5043.11	0.141542
138_16	35_16	1800	4.40347e+06	5.27556e+06	0	16.4565	11	5043.11	0.141542
202_17	56_17	1800	4.41876e+06	5.27259e+06	58.1524	16.2214	3.00792	2728.64	0.134307
65_15	46_15	1800	4.41017e+06	5.32667e+06	10.9537	15.9126	20	2736.53	0.169645
65_16	46_16	1800	4.41017e+06	5.32667e+06	10.9537	15.9126	20	2736.53	0.169645
5002_16	NUEVA_5_16	1800	4.38477e+06	5.29734e+06	32.02	15.752	19.2501	3883.34	0.145106
31_15	522_15	1800	4.42655e+06	5.28704e+06	43.1181	14.2563	13	968.17	0.131995
31_16	522_16	1800	4.42655e+06	5.28704e+06	43.1181	14.2563	13	968.17	0.131995
28_17	522_17	1800	4.42661e+06	5.28707e+06	43.1181	14.2563	1.95291	951.84	0.131995
193_15	1_15	1800	4.4137e+06	5.32771e+06	21.9074	14.197	22	2637.45	0.162549
66_15	1_15	1800	4.41451e+06	5.32931e+06	21.9074	14.197	21	4429.45	0.159868
66_16	1_16	1800	4.41451e+06	5.32931e+06	21.9074	14.197	21	4429.45	0.159868
193_16	1_16	1800	4.4137e+06	5.32771e+06	21.9074	14.197	22	2637.45	0.162549
201_17	56_17	1800	4.4171e+06	5.27293e+06	53.4047	14.0342	5.84157	2360.01	0.139978
48_15	55_15	1800	4.44501e+06	5.30305e+06	0	14.0268	14	2679.72	0.168982
48_16	55_16	1800	4.44501e+06	5.30305e+06	0	14.0268	14	2679.72	0.168982
3001_16	NUEVA_3_16	1800	4.3949e+06	5.29067e+06	24.1668	13.9907	18.0839	1633.28	0.147322
206_17	31_17	1800	4.41451e+06	5.25854e+06	69.2374	13.9539	11.2629	1057.83	0.131474
97_15	19_15	1800	4.43959e+06	5.32692e+06	6.9276	13.9108	14	7114.03	0.168395
97_16	19_16	1800	4.43959e+06	5.32692e+06	6.9276	13.9108	14	7114.03	0.168395
111_15	56_15	1800	4.41052e+06	5.27886e+06	46.2032	13.8553	14	3348.12	0.154997
111_16	56_16	1800	4.41052e+06	5.27886e+06	46.2032	13.8553	14	3348.12	0.154997
67_15	1_15	1800	4.41575e+06	5.33061e+06	30.5892	13.8423	21	6163.57	0.157524
183_15	1_15	1800	4.41736e+06	5.33127e+06	28.6798	13.8423	21	5443.02	0.169728
67_16	1_16	1800	4.41575e+06	5.33061e+06	30.5892	13.8423	21	6163.57	0.157524
183_16	1_16	1800	4.41736e+06	5.33127e+06	28.6798	13.8423	21	5443.02	0.169728
112_15	12_15	1800	4.39895e+06	5.27264e+06	0	13.0161	9	8390.23	0.130766
112_16	12_16	1800	4.39895e+06	5.27264e+06	0	13.0161	9	8390.23	0.130766
116_17	35_17	1800	4.40393e+06	5.27718e+06	0	12.9294	4.63276	3561.85	0.133426
19_15	31_15	1800	4.41603e+06	5.25949e+06	69.2374	12.9132	12	739.87	0.147323
20_15	31_15	1800	4.41753e+06	5.26044e+06	69.2374	12.9132	13	2513.87	0.153115
19_16	31_16	1800	4.41603e+06	5.25949e+06	69.2374	12.9132	12	739.87	0.147323
20_16	31_16	1800	4.41753e+06	5.26044e+06	69.2374	12.9132	13	2513.87	0.153115
46_17	38_17	1800	4.44407e+06	5.31227e+06	19.5637	12.6479	2.81989	10390.8	0.172827
200_17	56_17	1800	4.41555e+06	5.27371e+06	53.4047	12.5755	5.97078	1947.96	0.148917
84_17	15_17	1800	4.43023e+06	5.26667e+06	57.1029	12.5151	4.87197	2809.29	0.121904
170_15	12_15	1800	4.40072e+06	5.2725e+06	0	12.4305	10	7683	0.132561
171_15	12_15	1800	4.40251e+06	5.2723e+06	0	12.4305	10	7283.76	0.137539
170_16	12_16	1800	4.40072e+06	5.2725e+06	0	12.4305	10	7683	0.132561
171_16	12_16	1800	4.40251e+06	5.2723e+06	0	12.4305	10	7283.76	0.137539
32_15	34_15	1800	4.40088e+06	5.28379e+06	16.6818	12.1978	15	4935.42	0.161195
32_16	34_16	1800	4.40088e+06	5.28379e+06	16.6818	12.1978	15	4935.42	0.161195
83_17	15_17	1800	4.4316e+06	5.26569e+06	59.0218	12.0818	5.77162	1221.62	0.121097
50_17	38_17	1800	4.43957e+06	5.31421e+06	0	11.8245	2.19142	6367.44	0.176212
63_17	1_17	1800	4.41449e+06	5.32933e+06	21.9074	11.7912	13.3704	4435.8	0.15995
87_15	15_15	1800	4.43153e+06	5.26572e+06	59.0218	11.4664	8	1297.69	0.121097
88_15	15_15	1800	4.43023e+06	5.26662e+06	57.1029	11.4664	6	2792.89	0.121904
88_16	15_16	1800	4.43023e+06	5.26662e+06	57.1029	11.4664	6	2792.89	0.121904
87_16	15_16	1800	4.43153e+06	5.26572e+06	59.0218	11.4664	8	1297.69	0.121097
92_17	19_17	1800	4.43958e+06	5.32692e+06	6.9276	11.3086	4.32899	7114.43	0.168395
194_17	56_17	1800	4.40759e+06	5.28074e+06	55.7124	10.9278	7.98519	1574.15	0.154059
158_17	551_17	1800	4.42458e+06	5.30934e+06	0	10.8948	6.85036	10112.5	0.1526
181_17	NUEVA_2017_17	1800	4.38558e+06	5.29748e+06	32.02	10.7671	4.13324	4355.11	0.146368
135_17	16_17	1800	4.43146e+06	5.2974e+06	0	10.7478	3.1714	4956.97	0.153411
157_15	16_15	1800	4.43575e+06	5.29209e+06	0	10.7454	14	1792.54	0.159562
157_16	16_16	1800	4.43575e+06	5.29209e+06	0	10.7454	14	1792.54	0.159562
205_17	31_17	1800	4.41597e+06	5.25944e+06	69.2374	10.6502	10.2699	666.6	0.144552
5001_16	NUEVA_5_16	1800	4.38655e+06	5.29747e+06	32.02	10.5917	19.2501	5139.11	0.15256
199_17	56_17	1800	4.41415e+06	5.27484e+06	61.809	10.5071	2.87878	2210.86	0.152297
15_17	299_17	1800	4.43053e+06	5.26244e+06	50.1392	10.4739	5.22923	2159.27	0.158057
145_17	43_17	1800	4.44715e+06	5.28154e+06	31.2643	10.4533	7.52648	4044.56	0.152545
203_17	31_17	1800	4.41878e+06	5.26171e+06	69.2374	10.0542	3.3273	3782.53	0.151784
162_15	16_15	1800	4.43218e+06	5.29906e+06	0	9.9888	17	6020.74	0.160273
162_16	16_16	1800	4.43218e+06	5.29906e+06	0	9.9888	17	6020.74	0.160273
72_15	20_15	1800	4.42536e+06	5.33797e+06	21.2404	9.98555	22	2897.12	0.198886
72_16	20_16	1800	4.42536e+06	5.33797e+06	21.2404	9.98555	22	2897.12	0.198886
28_15	50_15	1800	4.42278e+06	5.29327e+06	28.947	9.91569	14	3895.65	0.15084
29_15	50_15	1800	4.42184e+06	5.29479e+06	15.765	9.91569	14	5168.1	0.147787
28_16	50_16	1800	4.42278e+06	5.29327e+06	28.947	9.91569	14	3895.65	0.15084
29_16	50_16	1800	4.42184e+06	5.29479e+06	15.765	9.91569	14	5168.1	0.147787
127_15	17_15	1800	4.4445e+06	5.29873e+06	0	9.87059	14	2966.97	0.165759
127_16	17_16	1800	4.4445e+06	5.29873e+06	0	9.87059	14	2966.97	0.165759
18_15	299_15	1800	4.42835e+06	5.25957e+06	33.4138	9.79883	12	1664.18	0.154494
18_16	299_16	1800	4.42835e+06	5.25957e+06	33.4138	9.79883	12	1664.18	0.154494
29_17	34_17	1800	4.40088e+06	5.28379e+06	16.6818	9.78875	2.18747	4929.68	0.161195
17_15	299_15	1800	4.42945e+06	5.26099e+06	50.1392	9.70504	11	3458.75	0.145021
17_16	299_16	1800	4.42945e+06	5.26099e+06	50.1392	9.70504	11	3458.75	0.145021
44_17	55_17	1800	4.44323e+06	5.30292e+06	0	9.69794	4.4442	3922.24	0.173235
146_17	30_17	1800	4.43337e+06	5.26361e+06	58.1004	9.40609	8.89692	952.87	0.138085
72_17	54_17	1800	4.43538e+06	5.33914e+06	13.8552	9.24508	6.64176	3213.75	0.181532
184_15	551_15	1800	4.42284e+06	5.30982e+06	0	9.18123	16	9182.63	0.143451
184_16	551_16	1800	4.42284e+06	5.30982e+06	0	9.18123	16	9182.63	0.143451
180_17	NUEVA_2017_17	1800	4.3838e+06	5.29721e+06	32.02	9.1646	5.13397	3448.71	0.141385
149_17	57_17	1800	4.41081e+06	5.29475e+06	28.519	9.15907	12.2111	898.99	0.13789
159_15	16_15	1800	4.43298e+06	5.29431e+06	0	9.14336	15	5314.42	0.163184
160_15	16_15	1800	4.43195e+06	5.29578e+06	0	9.14336	15	5562.68	0.157841
161_15	16_15	1800	4.43158e+06	5.29739e+06	0	9.14336	16	5072.55	0.153411
159_16	16_16	1800	4.43298e+06	5.29431e+06	0	9.14336	15	5314.42	0.163184
160_16	16_16	1800	4.43195e+06	5.29578e+06	0	9.14336	15	5562.68	0.157841
161_16	16_16	1800	4.43158e+06	5.29739e+06	0	9.14336	16	5072.55	0.153411
16_15	299_15	1800	4.43054e+06	5.26243e+06	50.1392	9.03874	10	2157.82	0.158057
16_16	299_16	1800	4.43054e+06	5.26243e+06	50.1392	9.03874	10	2157.82	0.158057
213_17	57_17	1800	4.40951e+06	5.29596e+06	28.519	9.02676	11.7335	875.06	0.140136
38_15	551_15	1800	4.42805e+06	5.3084e+06	0	8.93314	14	11510.8	0.1505
185_15	551_15	1800	4.42458e+06	5.30934e+06	0	8.93314	16	10112.6	0.1526
38_16	551_16	1800	4.42805e+06	5.3084e+06	0	8.93314	14	11510.8	0.1505
185_16	551_16	1800	4.42458e+06	5.30934e+06	0	8.93314	16	10112.6	0.1526
193_17	56_17	1800	4.40606e+06	5.28169e+06	65.2215	8.85478	6.4402	2307.01	0.151584
168_15	31_15	1800	4.4188e+06	5.26171e+06	69.2374	8.82516	13	3772.35	0.15166
168_16	31_16	1800	4.4188e+06	5.26171e+06	69.2374	8.82516	13	3772.35	0.15166
68_15	412_15	1800	4.42274e+06	5.334e+06	30.2557	8.79951	22	937.1	0.15272
68_16	412_16	1800	4.42274e+06	5.334e+06	30.2557	8.79951	22	937.1	0.15272
89_17	382_17	1800	4.4329e+06	5.31602e+06	12.3527	8.66475	3.7562	6071.94	0.164783
89_15	15_15	1800	4.42873e+06	5.26742e+06	54.3738	8.62199	6	3026.11	0.113631
89_16	15_16	1800	4.42873e+06	5.26742e+06	54.3738	8.62199	6	3026.11	0.113631
39_17	55_17	1800	4.44142e+06	5.30288e+06	0	8.59169	2.27631	5523.85	0.174447
114_17	33_17	1800	4.40629e+06	5.29528e+06	28.519	8.52986	4.53391	3809.86	0.157099
127_17	44_17	1800	4.44503e+06	5.28144e+06	31.2643	8.48079	4.5416	3515.09	0.150713
191_17	NUEVA_2017_17	1800	4.39886e+06	5.28683e+06	25.0227	8.47892	3.7145	3865.73	0.16585
196_17	56_17	1800	4.41063e+06	5.27881e+06	46.2032	8.17599	3.28037	3279.11	0.155096
207_17	31_17	1800	4.41295e+06	5.25791e+06	69.2374	8.06706	6.70754	2722.3	0.127835
70_15	412_15	1800	4.41947e+06	5.33259e+06	28.6798	8.05384	19	3054.75	0.171405
71_15	412_15	1800	4.42102e+06	5.33348e+06	39.2711	8.05384	19	1514.11	0.152327
70_16	412_16	1800	4.41947e+06	5.33259e+06	28.6798	8.05384	19	3054.75	0.171405
71_16	412_16	1800	4.42102e+06	5.33348e+06	39.2711	8.05384	19	1514.11	0.152327
139_15	35_15	1800	4.40393e+06	5.27712e+06	0	8.04261	10	3597.06	0.133426
140_15	35_15	1800	4.40382e+06	5.27859e+06	0	8.04261	12	2975.18	0.146517
139_16	35_16	1800	4.40393e+06	5.27712e+06	0	8.04261	10	3597.06	0.133426
140_16	35_16	1800	4.40382e+06	5.27859e+06	0	8.04261	12	2975.18	0.146517
221_17	33_17	1800	4.40739e+06	5.29668e+06	28.519	7.98634	3.66189	3050.19	0.151088
163_15	16_15	1800	4.43201e+06	5.3008e+06	0	7.93765	18	6674.54	0.152134
163_16	16_16	1800	4.43201e+06	5.3008e+06	0	7.93765	18	6674.54	0.152134
189_17	NUEVA_2017_17	1800	4.39585e+06	5.28873e+06	12.0834	7.85385	5.42916	2031.3	0.151952
90_15	15_15	1800	4.42772e+06	5.26847e+06	51.7626	7.8047	8	1559.42	0.12728
90_16	15_16	1800	4.42772e+06	5.26847e+06	51.7626	7.8047	8	1559.42	0.12728
204_17	31_17	1800	4.41751e+06	5.26043e+06	69.2374	7.75541	3.89645	2493.23	0.153076
154_17	377_17	1800	4.42084e+06	5.31114e+06	0	7.65362	3.6864	7688.75	0.14725
39_15	58_15	1800	4.41249e+06	5.28586e+06	24.4672	7.59526	12	1455.67	0.13674
40_15	58_15	1800	4.41274e+06	5.28762e+06	21.5665	7.59526	12	3172.46	0.141111
39_16	58_16	1800	4.41249e+06	5.28586e+06	24.4672	7.59526	12	1455.67	0.13674
40_16	58_16	1800	4.41274e+06	5.28762e+06	21.5665	7.59526	12	3172.46	0.141111
2001_16	NUEVA_2_16	1800	4.39916e+06	5.28675e+06	25.0227	7.5627	16.5293	3641.84	0.164267
113_17	33_17	1800	4.40551e+06	5.29364e+06	27.4897	7.53125	2.73492	3463.43	0.157983
61_17	46_17	1800	4.40844e+06	5.32718e+06	10.9537	7.2089	15.1401	4516.27	0.175959
36_17	58_17	1800	4.41252e+06	5.28573e+06	24.4672	7.19157	8.20254	1363.23	0.135084
90_17	382_17	1800	4.4312e+06	5.31665e+06	12.3527	7.11965	2.64633	7064.1	0.160644
164_17	43_17	1800	4.44704e+06	5.27975e+06	39.926	7.0998	3.50623	5532.04	0.156758
104_15	56_15	1800	4.409e+06	5.27983e+06	55.7124	7.05274	14	2366.24	0.154267
104_16	56_16	1800	4.409e+06	5.27983e+06	55.7124	7.05274	14	2366.24	0.154267
18_17	9_17	1800	4.44647e+06	5.26804e+06	64.1437	6.89457	6.4613	1972.18	0.166091
192_15	43_15	1800	4.44705e+06	5.27975e+06	39.926	6.866	13	5538.44	0.156758
192_16	43_16	1800	4.44705e+06	5.27975e+06	39.926	6.866	13	5538.44	0.156758
192_17	56_17	1800	4.40448e+06	5.28255e+06	30.3667	6.8473	3.1552	3776.81	0.163375
53_17	22_17	1800	4.44107e+06	5.31986e+06	37.0581	6.77565	8.74704	3753.28	0.165493
2002_16	NUEVA_2_16	1800	4.39753e+06	5.28749e+06	24.1668	6.6438	16.5293	4071.34	0.159229
117_17	35_17	1800	4.40375e+06	5.27866e+06	0	6.63461	9.47182	3021.46	0.146517
122_15	17_15	1800	4.43947e+06	5.29378e+06	19.963	6.62834	13	3272.29	0.171323
123_15	17_15	1800	4.44084e+06	5.29494e+06	0	6.62834	14	5056.37	0.165304
122_16	17_16	1800	4.43947e+06	5.29378e+06	19.963	6.62834	13	3272.29	0.171323
123_16	17_16	1800	4.44084e+06	5.29494e+06	0	6.62834	14	5056.37	0.165304
150_15	44_15	1800	4.44503e+06	5.28144e+06	31.2643	6.60441	13	3514.5	0.150713
150_16	44_16	1800	4.44503e+06	5.28144e+06	31.2643	6.60441	13	3514.5	0.150713
105_15	56_15	1800	4.40748e+06	5.28079e+06	55.7124	6.57816	13	1555.61	0.152692
187_15	56_15	1800	4.40439e+06	5.28261e+06	30.3667	6.57816	13	3879.76	0.163619
106_15	56_15	1800	4.40596e+06	5.28175e+06	30.3667	6.57816	14	2393.1	0.152457
105_16	56_16	1800	4.40748e+06	5.28079e+06	55.7124	6.57816	13	1555.61	0.152692
187_16	56_16	1800	4.40439e+06	5.28261e+06	30.3667	6.57816	13	3879.76	0.163619
106_16	56_16	1800	4.40596e+06	5.28175e+06	30.3667	6.57816	14	2393.1	0.152457
96_17	N4_17	1800	4.41045e+06	5.26278e+06	47.5585	6.55081	9.48177	1079.49	0.144321
134_17	16_17	1800	4.43196e+06	5.29578e+06	0	6.51485	3.79888	5570.41	0.157841
87_17	15_17	1800	4.42655e+06	5.26975e+06	51.7626	6.46132	7.95917	173.33	0.132685
98_15	19_15	1800	4.43833e+06	5.32563e+06	6.9276	6.36133	17	5549.79	0.179402
98_16	19_16	1800	4.43833e+06	5.32563e+06	6.9276	6.36133	17	5549.79	0.179402
158_15	16_15	1800	4.43423e+06	5.29302e+06	0	6.14304	14	3569.56	0.160533
158_16	16_16	1800	4.43423e+06	5.29302e+06	0	6.14304	14	3569.56	0.160533
8_15	61_15	1800	4.42205e+06	5.2664e+06	63.6949	6.1372	6	2045.88	0.111537
8_16	61_16	1800	4.42205e+06	5.2664e+06	63.6949	6.1372	6	2045.88	0.111537
37_17	58_17	1800	4.4127e+06	5.28762e+06	21.5665	6.10185	7.14403	3164.78	0.141111
1_15	45_15	1800	4.44364e+06	5.2674e+06	64.1437	6.0588	11	959.2	0.1454
3_15	45_15	1800	4.44209e+06	5.26831e+06	43.3581	6.0588	12	2652.09	0.149032
1_16	45_16	1800	4.44364e+06	5.2674e+06	64.1437	6.0588	11	959.2	0.1454
3_16	45_16	1800	4.44209e+06	5.26831e+06	43.3581	6.0588	12	2652.09	0.149032
0_17	45_17	1800	4.44364e+06	5.26739e+06	64.1437	6.0588	6.4613	956.79	0.1454
176_15	57_15	1800	4.41084e+06	5.29479e+06	28.519	5.9737	15	903.49	0.13789
176_16	57_16	1800	4.41084e+06	5.29479e+06	28.519	5.9737	15	903.49	0.13789
164_15	16_15	1800	4.4314e+06	5.30248e+06	0	5.9194	17	7343.33	0.148134
164_16	16_16	1800	4.4314e+06	5.30248e+06	0	5.9194	17	7343.33	0.148134
93_15	382_15	1800	4.4329e+06	5.31604e+06	0	5.91436	14	6053.11	0.164783
94_15	382_15	1800	4.43121e+06	5.31665e+06	0	5.91436	16	7054.51	0.160644
93_16	382_16	1800	4.4329e+06	5.31604e+06	0	5.91436	14	6053.11	0.164783
94_16	382_16	1800	4.43121e+06	5.31665e+06	0	5.91436	16	7054.51	0.160644
16_17	299_17	1800	4.42945e+06	5.26099e+06	50.1392	5.86016	7.86773	3458.67	0.145021
195_17	56_17	1800	4.40911e+06	5.27978e+06	46.2032	5.8263	6.78032	2470.48	0.153304
12_15	29_15	1800	4.4204e+06	5.26073e+06	69.2374	5.78759	13	3868.44	0.159784
12_16	29_16	1800	4.4204e+06	5.26073e+06	69.2374	5.78759	13	3868.44	0.159784
25_17	50_17	1800	4.4228e+06	5.29328e+06	28.947	5.7561	2.13884	3896.76	0.15084
186_15	551_15	1800	4.42631e+06	5.30887e+06	0	5.73088	15	11252.1	0.154716
186_16	551_16	1800	4.42631e+06	5.30887e+06	0	5.73088	15	11252.1	0.154716
141_17	27_17	1800	4.40276e+06	5.26943e+06	12.0308	5.7214	8.75142	4429.05	0.10894
165_17	NUEVA_17	1800	4.41014e+06	5.2854e+06	35.1969	5.70186	4.3468	1804.72	0.142404
126_17	44_17	1800	4.44326e+06	5.28131e+06	31.2643	5.692	3.50825	1766.73	0.154478
86_17	15_17	1800	4.42751e+06	5.26831e+06	51.7626	5.68974	9.11278	1557.63	0.12728
27_15	50_15	1800	4.42364e+06	5.29171e+06	28.947	5.67501	13	2123.37	0.152605
27_16	50_16	1800	4.42364e+06	5.29171e+06	28.947	5.67501	13	2123.37	0.152605
6_15	30_15	1800	4.4351e+06	5.2631e+06	58.1004	5.60312	10	2699.03	0.147482
173_15	30_15	1800	4.43338e+06	5.26359e+06	58.1004	5.60312	11	959.73	0.138085
6_16	30_16	1800	4.4351e+06	5.2631e+06	58.1004	5.60312	10	2699.03	0.147482
173_16	30_16	1800	4.43338e+06	5.26359e+06	58.1004	5.60312	11	959.73	0.138085
184_17	NUEVA_2017_17	1800	4.39031e+06	5.29534e+06	24.1668	5.52789	2.39643	4904.05	0.164337
137_15	33_15	1800	4.4074e+06	5.29667e+06	28.519	5.47251	16	3036.7	0.151088
137_16	33_16	1800	4.4074e+06	5.29667e+06	28.519	5.47251	16	3036.7	0.151088
185_17	NUEVA_2017_17	1800	4.39179e+06	5.29436e+06	24.1668	5.41511	2.60808	4000.84	0.161868
74_15	54_15	1800	4.4342e+06	5.33778e+06	13.8552	5.39236	20	1748.03	0.174201
75_15	54_15	1800	4.43538e+06	5.33915e+06	13.8552	5.39236	20	3211.34	0.181532
74_16	54_16	1800	4.4342e+06	5.33778e+06	13.8552	5.39236	20	1748.03	0.174201
75_16	54_16	1800	4.43538e+06	5.33915e+06	13.8552	5.39236	20	3211.34	0.181532
183_17	NUEVA_2017_17	1800	4.38871e+06	5.29615e+06	24.1668	5.31019	2.42004	6330.93	0.167471
36_15	43_15	1800	4.44737e+06	5.28332e+06	22.6026	5.21942	14	2248.04	0.145378
172_15	43_15	1800	4.44713e+06	5.28154e+06	31.2643	5.21942	14	4042.41	0.152545
36_16	43_16	1800	4.44737e+06	5.28332e+06	22.6026	5.21942	14	2248.04	0.145378
172_16	43_16	1800	4.44713e+06	5.28154e+06	31.2643	5.21942	14	4042.41	0.152545
186_17	NUEVA_2017_17	1800	4.39328e+06	5.2934e+06	24.1668	5.18989	3.08179	3753.36	0.156646
42_15	55_15	1800	4.44143e+06	5.3029e+06	0	5.17388	15	5529.99	0.174447
47_15	55_15	1800	4.44323e+06	5.30292e+06	0	5.17388	15	3922.24	0.173235
42_16	55_16	1800	4.44143e+06	5.3029e+06	0	5.17388	15	5529.99	0.174447
47_16	55_16	1800	4.44323e+06	5.30292e+06	0	5.17388	15	3922.24	0.173235
143_17	12_17	1800	4.40073e+06	5.27254e+06	0	5.15145	10.48	7723.63	0.132561
125_15	17_15	1800	4.44306e+06	5.29772e+06	0	5.1339	14	4706.11	0.159659
125_16	17_16	1800	4.44306e+06	5.29772e+06	0	5.1339	14	4706.11	0.159659
95_15	47_15	1800	4.4196e+06	5.3148e+06	12.2986	5.11729	16	4284.87	0.153655
95_16	47_16	1800	4.4196e+06	5.3148e+06	12.2986	5.11729	16	4284.87	0.153655
159_17	551_17	1800	4.42631e+06	5.30887e+06	0	5.09589	4.2143	11252.9	0.154716
40_17	55_17	1800	4.43967e+06	5.30313e+06	0	5.02227	3.47898	7261.5	0.169248
167_15	27_15	1800	4.40263e+06	5.26933e+06	12.0308	5.00653	5	4321.95	0.10894
167_16	27_16	1800	4.40263e+06	5.26933e+06	12.0308	5.00653	5	4321.95	0.10894
136_15	33_15	1800	4.40632e+06	5.29526e+06	28.519	4.99075	15	3815.63	0.157099
136_16	33_16	1800	4.40632e+06	5.29526e+06	28.519	4.99075	15	3815.63	0.157099
156_17	1_17	1800	4.41737e+06	5.33123e+06	28.6798	4.90774	6.36789	5446.2	0.169728
132_17	44_17	1800	4.43663e+06	5.27852e+06	31.2492	4.9047	5.37678	4624.78	0.152753
5_17	30_17	1800	4.43511e+06	5.26312e+06	58.1004	4.89089	13.7339	2704.53	0.147482
181_15	377_15	1800	4.42167e+06	5.31274e+06	0	4.79772	17	6113.82	0.145054
181_16	377_16	1800	4.42167e+06	5.31274e+06	0	4.79772	17	6113.82	0.145054
51_17	21_17	1800	4.43651e+06	5.32088e+06	18.5291	4.75177	6.06062	1077.82	0.17314
103_15	444_15	1800	4.41042e+06	5.26281e+06	47.5585	4.66144	10	1068.87	0.144321
102_15	444_15	1800	4.40918e+06	5.26153e+06	60.8792	4.66144	12	987.7	0.152595
103_16	N4_16	1800	4.41042e+06	5.26281e+06	47.5585	4.66144	10	1068.87	0.144321
102_16	N4_16	1800	4.40918e+06	5.26153e+06	60.8792	4.66144	12	987.7	0.152595
79_17	54_17	1800	4.43324e+06	5.33627e+06	13.8552	4.58709	4.76621	1731.3	0.176123
151_15	44_15	1800	4.43829e+06	5.27922e+06	39.926	4.49247	15	3628.71	0.151647
155_15	44_15	1800	4.43662e+06	5.27854e+06	31.2492	4.49247	15	4608.22	0.152753
151_16	44_16	1800	4.43829e+06	5.27922e+06	39.926	4.49247	15	3628.71	0.151647
155_16	44_16	1800	4.43662e+06	5.27854e+06	31.2492	4.49247	15	4608.22	0.152753
86_15	101_15	1800	4.40866e+06	5.2933e+06	15.765	4.4214	15	2521.09	0.144037
86_16	101_16	1800	4.40866e+06	5.2933e+06	15.765	4.4214	15	2521.09	0.144037
182_17	NUEVA_2017_17	1800	4.38736e+06	5.29733e+06	32.02	4.41092	5.05813	5894.06	0.163051
9_15	61_15	1800	4.42217e+06	5.2681e+06	46.5631	4.40548	7	3713.18	0.122682
10_15	61_15	1800	4.42227e+06	5.26974e+06	46.5631	4.40548	7	4397.27	0.124263
9_16	61_16	1800	4.42217e+06	5.2681e+06	46.5631	4.40548	7	3713.18	0.122682
10_16	61_16	1800	4.42227e+06	5.26974e+06	46.5631	4.40548	7	4397.27	0.124263
71_17	54_17	1800	4.43419e+06	5.3378e+06	13.8552	4.40006	5.5403	1730.28	0.174201
109_17	33_17	1800	4.40189e+06	5.28753e+06	25.8787	4.37995	3.78265	1069.34	0.160342
12_17	29_17	1800	4.42211e+06	5.26031e+06	69.2374	4.3421	2.21215	4226.36	0.15442
208_17	24_17	1800	4.43621e+06	5.27292e+06	34.5776	4.31004	3.15443	2503.8	0.146035
1002_16	NUEVA_16	1800	4.40842e+06	5.28581e+06	35.1969	4.2802	14.6941	3552.5	0.144445
215_17	382_17	1800	4.43467e+06	5.31569e+06	0	4.22813	2.49401	5213.86	0.164702
69_17	20_17	1800	4.42536e+06	5.33796e+06	21.2404	4.20979	4.48516	2887.3	0.198886
124_15	17_15	1800	4.44211e+06	5.2962e+06	0	4.1954	14	6448.2	0.164656
124_16	17_16	1800	4.44211e+06	5.2962e+06	0	4.1954	14	6448.2	0.164656
1001_16	NUEVA_16	1800	4.41015e+06	5.2854e+06	35.1969	4.1833	14.8128	1795.12	0.142404
82_17	101_17	1800	4.40859e+06	5.29318e+06	15.765	4.17328	4.67212	2665.92	0.14401
11_17	29_17	1800	4.42037e+06	5.26059e+06	69.2374	4.12454	3.1184	4006.18	0.159784
14_17	29_17	1800	4.42532e+06	5.25868e+06	51.3256	4.04419	5.75859	1889.47	0.154324
26_17	50_17	1800	4.42184e+06	5.29479e+06	15.765	4.03821	1.84194	5176.9	0.147787
7_17	61_17	1800	4.42202e+06	5.26643e+06	63.6949	3.99537	11.6317	2065.46	0.111537
1003_16	NUEVA_16	1800	4.40662e+06	5.28596e+06	35.1969	3.9903	14.6941	4970.35	0.148848
167_17	NUEVA_17	1800	4.40662e+06	5.28596e+06	35.1969	3.98506	6.01764	4964.98	0.148848
67_17	412_17	1800	4.41947e+06	5.33259e+06	28.6798	3.90275	7.16138	3055.41	0.171405
3002_16	NUEVA_3_16	1800	4.39398e+06	5.29221e+06	24.1668	3.8792	18.0839	2848.31	0.140043
10_17	61_17	1800	4.42242e+06	5.27144e+06	58.1524	3.85677	4.01116	4416.79	0.137227
54_17	22_17	1800	4.43931e+06	5.32011e+06	37.0581	3.849	2.25435	1982.26	0.176157
41_15	58_15	1800	4.41298e+06	5.28938e+06	21.5665	3.82101	13	4935.1	0.143334
41_16	58_16	1800	4.41298e+06	5.28938e+06	21.5665	3.82101	13	4935.1	0.143334
15_15	29_15	1800	4.42531e+06	5.25865e+06	51.3256	3.81247	12	1894.21	0.154324
15_16	29_16	1800	4.42531e+06	5.25865e+06	51.3256	3.81247	12	1894.21	0.154324
76_17	54_17	1800	4.43044e+06	5.33167e+06	17.5478	3.81088	13.9337	5429.43	0.178727
4002_16	NUEVA_4_16	1800	4.3897e+06	5.29566e+06	24.1668	3.802	19.4843	5420.62	0.166214
77_17	54_17	1800	4.43144e+06	5.33316e+06	13.8552	3.80049	6.98207	4761.6	0.184431
64_17	1_17	1800	4.41571e+06	5.33069e+06	30.5892	3.7917	19.1975	6215.92	0.157524
128_17	44_17	1800	4.43829e+06	5.27922e+06	39.926	3.74918	4.45702	3629.63	0.151647
142_17	N1_17	1800	4.4053e+06	5.26086e+06	55.5809	3.72348	11.1031	2970.69	0.137267
24_17	50_17	1800	4.42366e+06	5.29172e+06	28.947	3.68844	1.95291	2124	0.152605
91_15	15_15	1800	4.4266e+06	5.26974e+06	51.7626	3.67856	8	135.87	0.132685
91_16	15_16	1800	4.4266e+06	5.26974e+06	51.7626	3.67856	8	135.87	0.132685
131_15	33_15	1800	4.40189e+06	5.28753e+06	25.8787	3.67732	16	1069.38	0.160342
132_15	33_15	1800	4.40279e+06	5.2891e+06	25.8787	3.67732	16	737.96	0.156329
131_16	33_16	1800	4.40189e+06	5.28753e+06	25.8787	3.67732	16	1069.38	0.160342
132_16	33_16	1800	4.40279e+06	5.2891e+06	25.8787	3.67732	16	737.96	0.156329
35_15	23_15	1800	4.44545e+06	5.27718e+06	31.2492	3.65871	12	5230.14	0.161688
191_15	23_15	1800	4.4438e+06	5.27647e+06	22.5725	3.65871	13	4781.6	0.157294
35_16	23_16	1800	4.44545e+06	5.27718e+06	31.2492	3.65871	12	5230.14	0.161688
191_16	23_16	1800	4.4438e+06	5.27647e+06	22.5725	3.65871	13	4781.6	0.157294
11_15	61_15	1800	4.42245e+06	5.27144e+06	46.5631	3.63258	9	4405.17	0.137227
11_16	61_16	1800	4.42245e+06	5.27144e+06	46.5631	3.63258	9	4405.17	0.137227
103_17	42_17	1800	4.41854e+06	5.32632e+06	21.3428	3.61078	5.22626	3754.47	0.173585
125_17	4_17	1800	4.42821e+06	5.31651e+06	0	3.56781	2.67956	7508.36	0.156481
4001_16	NUEVA_4_16	1800	4.39127e+06	5.2948e+06	24.1668	3.5649	19.4843	4209.95	0.163038
112_17	33_17	1800	4.40472e+06	5.29204e+06	26.9527	3.56183	4.82321	3973.97	0.155166
84_15	3_15	1800	4.43441e+06	5.28876e+06	0	3.50994	14	3874.68	0.154266
84_16	3_16	1800	4.43441e+06	5.28876e+06	0	3.50994	14	3874.68	0.154266
92_15	382_15	1800	4.43467e+06	5.31569e+06	0	3.50482	14	5213.02	0.164702
92_16	382_16	1800	4.43467e+06	5.31569e+06	0	3.50482	14	5213.02	0.164702
140_17	27_17	1800	4.40356e+06	5.26795e+06	24.0616	3.50115	24.8748	3138.03	0.088191
54_15	21_15	1800	4.43652e+06	5.32088e+06	18.5291	3.49289	18	1069.67	0.17314
54_16	21_16	1800	4.43652e+06	5.32088e+06	18.5291	3.49289	18	1069.67	0.17314
190_17	NUEVA_2017_17	1800	4.39727e+06	5.28766e+06	24.1668	3.48615	4.27342	3762.72	0.156255
163_17	23_17	1800	4.4438e+06	5.27646e+06	22.5725	3.48335	3.51996	4791.91	0.157294
169_15	111_15	1800	4.40527e+06	5.26067e+06	55.5809	3.46738	11	3028.62	0.137267
169_16	N1_16	1800	4.40527e+06	5.26067e+06	55.5809	3.46738	11	3028.62	0.137267
13_15	29_15	1800	4.42209e+06	5.26025e+06	69.2374	3.43725	12	4283.03	0.15442
14_15	29_15	1800	4.42368e+06	5.2594e+06	51.3256	3.43725	12	3655.73	0.157491
13_16	29_16	1800	4.42209e+06	5.26025e+06	69.2374	3.43725	12	4283.03	0.15442
14_16	29_16	1800	4.42368e+06	5.2594e+06	51.3256	3.43725	12	3655.73	0.157491
70_17	20_17	1800	4.42597e+06	5.33628e+06	21.2404	3.42882	3.39903	1098.3	0.18513
13_17	29_17	1800	4.42368e+06	5.2594e+06	51.3256	3.42797	3.34718	3656.46	0.157491
2_15	45_15	1800	4.43782e+06	5.27158e+06	34.5776	3.40698	14	454.81	0.148411
2_16	45_16	1800	4.43782e+06	5.27158e+06	34.5776	3.40698	14	454.81	0.148411
108_17	244_17	1800	4.44123e+06	5.27492e+06	22.5725	3.25823	3.70784	4961.52	0.152184
42_17	55_17	1800	4.43633e+06	5.30451e+06	0	3.24975	3.72999	10860.1	0.159275
130_15	24_15	1800	4.44123e+06	5.27491e+06	22.5725	3.24053	14	4953.79	0.152184
130_16	24_16	1800	4.44123e+06	5.27491e+06	22.5725	3.24053	14	4953.79	0.152184
32_17	23_17	1800	4.44545e+06	5.27718e+06	31.2492	3.23702	3.42057	5230.64	0.161688
43_15	55_15	1800	4.43968e+06	5.30318e+06	0	3.20739	15	7264.47	0.169248
43_16	55_16	1800	4.43968e+06	5.30318e+06	0	3.20739	15	7264.47	0.169248
135_15	33_15	1800	4.40552e+06	5.29365e+06	27.4897	3.18574	15	3468.56	0.157983
133_15	33_15	1800	4.40392e+06	5.29042e+06	20.8219	3.18574	16	2481.48	0.155149
134_15	33_15	1800	4.40472e+06	5.29204e+06	26.9527	3.18574	16	3974.25	0.155166
135_16	33_16	1800	4.40552e+06	5.29365e+06	27.4897	3.18574	15	3468.56	0.157983
133_16	33_16	1800	4.40392e+06	5.29042e+06	20.8219	3.18574	16	2481.48	0.155149
134_16	33_16	1800	4.40472e+06	5.29204e+06	26.9527	3.18574	16	3974.25	0.155166
4_17	45_17	1800	4.43911e+06	5.27033e+06	46.5828	3.14505	3.57061	1394.07	0.146285
128_15	24_15	1800	4.43776e+06	5.27417e+06	22.5725	3.11225	14	3015.23	0.145668
129_15	24_15	1800	4.43945e+06	5.27463e+06	22.5725	3.11225	14	3768.55	0.146209
128_16	24_16	1800	4.43776e+06	5.27417e+06	22.5725	3.11225	14	3015.23	0.145668
129_16	24_16	1800	4.43945e+06	5.27463e+06	22.5725	3.11225	14	3768.55	0.146209
85_17	15_17	1800	4.42876e+06	5.26749e+06	54.3738	3.099	13.9628	2995.38	0.113631
9_17	61_17	1800	4.42224e+06	5.26976e+06	58.1524	3.079	16.54	4422.55	0.124263
93_17	19_17	1800	4.43831e+06	5.32565e+06	6.9276	3.07403	3.39442	5563.85	0.179402
44_15	55_15	1800	4.43801e+06	5.30384e+06	0	3.0618	14	9062.18	0.165651
44_16	55_16	1800	4.43801e+06	5.30384e+06	0	3.0618	14	9062.18	0.165651
7_15	555_15	1800	4.40345e+06	5.26271e+06	34.523	3.05739	13	2513.21	0.150856
7_16	N5_16	1800	4.40345e+06	5.26271e+06	34.523	3.05739	13	2513.21	0.150856
33_17	43_17	1800	4.44737e+06	5.28332e+06	22.6026	3.04966	4.35185	2249.54	0.145378
219_17	21_17	1800	4.43512e+06	5.32209e+06	18.5291	3.04511	5.40346	2918.96	0.178893
73_15	20_15	1800	4.42596e+06	5.33628e+06	21.2404	3.02484	21	1097.13	0.18513
73_16	20_16	1800	4.42596e+06	5.33628e+06	21.2404	3.02484	21	1097.13	0.18513
88_17	382_17	1800	4.43644e+06	5.31542e+06	0	3.01929	3.13922	4838.83	0.160957
82_15	54_15	1800	4.43324e+06	5.33627e+06	13.8552	2.96895	20	1731.87	0.176123
82_16	54_16	1800	4.43324e+06	5.33627e+06	13.8552	2.96895	20	1731.87	0.176123
41_17	55_17	1800	4.43801e+06	5.30384e+06	0	2.96885	2.4737	9062.18	0.165651
139_17	27_17	1800	4.40314e+06	5.26628e+06	24.0616	2.96066	34.2103	1442.61	0.11593
121_17	37_17	1800	4.42568e+06	5.32119e+06	12.2986	2.95324	4.94352	5185.68	0.160243
122_17	4_17	1800	4.42445e+06	5.31268e+06	0	2.92217	3.2712	7022.15	0.148699
68_17	412_17	1800	4.42101e+06	5.33351e+06	39.2711	2.88407	9.23339	1534.49	0.152327
43_17	55_17	1800	4.43466e+06	5.30515e+06	0	2.86586	3.65535	11519	0.154052
35_17	551_17	1800	4.42806e+06	5.30841e+06	0	2.82857	3.74814	11519.7	0.1505
1_17	45_17	1800	4.43782e+06	5.27158e+06	34.5776	2.82179	3.54724	457.73	0.148411
155_17	40_17	1800	4.4272e+06	5.33399e+06	21.2404	2.80592	13.1639	1502.86	0.176355
182_15	40_15	1800	4.42722e+06	5.334e+06	21.2404	2.79993	23	1512.43	0.176355
182_16	40_16	1800	4.42722e+06	5.334e+06	21.2404	2.79993	23	1512.43	0.176355
151_17	57_17	1800	4.41304e+06	5.29215e+06	15.765	2.76816	8.17917	4326.03	0.138504
145_15	4_15	1800	4.42443e+06	5.3127e+06	0	2.76528	16	6991.19	0.148699
145_16	4_16	1800	4.42443e+06	5.3127e+06	0	2.76528	16	6991.19	0.148699
4_15	45_15	1800	4.44056e+06	5.26927e+06	44.433	2.7493	13	3194.41	0.149503
4_16	45_16	1800	4.44056e+06	5.26927e+06	44.433	2.7493	13	3194.41	0.149503
38_17	58_17	1800	4.41295e+06	5.28939e+06	21.5665	2.72405	2.87842	4934.66	0.143334
146_15	4_15	1800	4.42561e+06	5.31406e+06	0	2.72114	16	6582.91	0.150261
147_15	4_15	1800	4.42677e+06	5.31544e+06	0	2.72114	16	6634.88	0.160841
146_16	4_16	1800	4.42561e+06	5.31406e+06	0	2.72114	16	6582.91	0.150261
147_16	4_16	1800	4.42677e+06	5.31544e+06	0	2.72114	16	6634.88	0.160841
99_15	19_15	1800	4.43704e+06	5.32438e+06	6.9276	2.70325	19	4218.3	0.181929
100_15	19_15	1800	4.43557e+06	5.32336e+06	18.5291	2.70325	19	3637.57	0.17805
99_16	19_16	1800	4.43704e+06	5.32438e+06	6.9276	2.70325	19	4218.3	0.181929
100_16	19_16	1800	4.43557e+06	5.32336e+06	18.5291	2.70325	19	3637.57	0.17805
149_15	44_15	1800	4.44327e+06	5.28126e+06	31.2643	2.68617	14	1764.42	0.154478
153_15	44_15	1800	4.44156e+06	5.28072e+06	39.926	2.68617	14	35.8	0.157107
152_15	44_15	1800	4.43993e+06	5.27994e+06	39.926	2.68617	15	1831.62	0.162007
149_16	44_16	1800	4.44327e+06	5.28126e+06	31.2643	2.68617	14	1764.42	0.154478
153_16	44_16	1800	4.44156e+06	5.28072e+06	39.926	2.68617	14	35.8	0.157107
152_16	44_16	1800	4.43993e+06	5.27994e+06	39.926	2.68617	15	1831.62	0.162007
45_15	55_15	1800	4.43634e+06	5.30451e+06	0	2.67532	15	10860.7	0.159275
46_15	55_15	1800	4.43466e+06	5.30517e+06	0	2.67532	15	11540.2	0.154052
175_15	55_15	1800	4.43312e+06	5.30609e+06	0	2.67532	15	11243	0.148929
45_16	55_16	1800	4.43634e+06	5.30451e+06	0	2.67532	15	10860.7	0.159275
46_16	55_16	1800	4.43466e+06	5.30517e+06	0	2.67532	15	11540.2	0.154052
175_16	55_16	1800	4.43312e+06	5.30609e+06	0	2.67532	15	11243	0.148929
8_17	61_17	1800	4.42234e+06	5.26807e+06	63.6949	2.6688	19.9023	3730.46	0.122682
2_17	45_17	1800	4.44208e+06	5.26831e+06	43.3581	2.65392	4.69507	2653.93	0.149032
80_17	54_17	1800	4.42815e+06	5.32679e+06	14.1352	2.65214	3.28603	5934.01	0.179289
119_15	42_15	1800	4.42032e+06	5.32657e+06	21.3428	2.6123	21	1964.84	0.167779
119_16	42_16	1800	4.42032e+06	5.32657e+06	21.3428	2.6123	21	1964.84	0.167779
5_15	45_15	1800	4.43912e+06	5.27034e+06	46.5828	2.60352	14	1394.49	0.146285
5_16	45_16	1800	4.43912e+06	5.27034e+06	46.5828	2.60352	14	1394.49	0.146285
65_17	412_17	1800	4.42275e+06	5.33399e+06	30.2557	2.58465	14.8726	932.2	0.15272
107_17	244_17	1800	4.43945e+06	5.27463e+06	22.5725	2.5838	2.96996	3766.29	0.146209
80_15	54_15	1800	4.43147e+06	5.33315e+06	13.8552	2.56123	20	4768	0.184431
79_15	54_15	1800	4.43046e+06	5.33166e+06	17.5478	2.56123	22	5455.3	0.178727
80_16	54_16	1800	4.43147e+06	5.33315e+06	13.8552	2.56123	20	4768	0.184431
79_16	54_16	1800	4.43046e+06	5.33166e+06	17.5478	2.56123	22	5455.3	0.178727
150_17	57_17	1800	4.41181e+06	5.29325e+06	15.765	2.55893	3.9443	2684.43	0.141534
69_15	412_15	1800	4.42445e+06	5.33457e+06	21.2404	2.54225	23	1959.17	0.184498
69_16	412_16	1800	4.42445e+06	5.33457e+06	21.2404	2.54225	23	1959.17	0.184498
165_15	27_15	1800	4.40318e+06	5.26627e+06	24.0616	2.53869	7	1459.2	0.11593
166_15	27_15	1800	4.40347e+06	5.26801e+06	24.0616	2.53869	6	3164.89	0.088191
166_16	27_16	1800	4.40347e+06	5.26801e+06	24.0616	2.53869	6	3164.89	0.088191
165_16	27_16	1800	4.40318e+06	5.26627e+06	24.0616	2.53869	7	1459.2	0.11593
116_15	48_15	1800	4.42459e+06	5.32556e+06	24.5971	2.52236	21	2810.87	0.172909
115_15	48_15	1800	4.42617e+06	5.32469e+06	12.2986	2.52236	23	4606.46	0.172019
116_16	48_16	1800	4.42459e+06	5.32556e+06	24.5971	2.52236	21	2810.87	0.172909
115_16	48_16	1800	4.42617e+06	5.32469e+06	12.2986	2.52236	23	4606.46	0.172019
100_17	48_17	1800	4.42617e+06	5.32469e+06	12.2986	2.52236	2.69528	4612.88	0.172019
95_17	N4_17	1800	4.40919e+06	5.26148e+06	60.8792	2.51814	3.58534	985.83	0.152595
156_15	16_15	1800	4.43172e+06	5.30425e+06	0	2.50531	16	8927.28	0.140127
156_16	16_16	1800	4.43172e+06	5.30425e+06	0	2.50531	16	8927.28	0.140127
117_15	42_15	1800	4.41677e+06	5.32603e+06	25.966	2.50034	21	4266.37	0.169101
118_15	42_15	1800	4.41854e+06	5.32634e+06	21.3428	2.50034	21	3751.96	0.173585
117_16	42_16	1800	4.41677e+06	5.32603e+06	25.966	2.50034	21	4266.37	0.169101
118_16	42_16	1800	4.41854e+06	5.32634e+06	21.3428	2.50034	21	3751.96	0.173585
75_17	54_17	1800	4.42961e+06	5.33008e+06	13.8552	2.48825	3.40727	6090.41	0.176185
78_15	54_15	1800	4.42961e+06	5.33008e+06	13.8552	2.47165	22	6090.41	0.176185
78_16	54_16	1800	4.42961e+06	5.33008e+06	13.8552	2.47165	22	6090.41	0.176185
74_17	54_17	1800	4.42888e+06	5.32843e+06	13.8552	2.44951	2.8435	6795.24	0.178857
142_15	37_15	1800	4.42343e+06	5.31623e+06	0	2.44772	18	3514.71	0.160781
143_15	37_15	1800	4.42421e+06	5.31785e+06	0	2.44772	18	3293.2	0.165253
142_16	37_16	1800	4.42343e+06	5.31623e+06	0	2.44772	18	3514.71	0.160781
143_16	37_16	1800	4.42421e+06	5.31785e+06	0	2.44772	18	3293.2	0.165253
144_15	37_15	1800	4.42494e+06	5.3195e+06	0	2.44381	19	3927.62	0.16272
144_16	37_16	1800	4.42494e+06	5.3195e+06	0	2.44381	19	3927.62	0.16272
161_17	53_17	1800	4.42817e+06	5.3244e+06	12.2986	2.44109	2.55927	6522.2	0.173605
3_17	45_17	1800	4.44056e+06	5.26925e+06	44.433	2.43832	3.40192	3195.22	0.149503
136_17	16_17	1800	4.43221e+06	5.29905e+06	0	2.42457	2.82797	6046.85	0.160273
129_17	44_17	1800	4.43994e+06	5.27994e+06	39.926	2.40114	4.46247	1830.58	0.162007
119_17	37_17	1800	4.42343e+06	5.31622e+06	8.19903	2.39575	3.18178	3517.95	0.160781
81_15	54_15	1800	4.43233e+06	5.33471e+06	13.8552	2.39128	20	3100.38	0.193165
81_16	54_16	1800	4.43233e+06	5.33471e+06	13.8552	2.39128	20	3100.38	0.193165
148_15	4_15	1800	4.42818e+06	5.31652e+06	0	2.39031	16	7482.13	0.156481
148_16	4_16	1800	4.42818e+06	5.31652e+06	0	2.39031	16	7482.13	0.156481
138_17	16_17	1800	4.4314e+06	5.30248e+06	0	2.38986	4.59979	7341.31	0.148134
114_15	53_15	1800	4.42975e+06	5.32353e+06	0	2.38898	22	8290.02	0.173825
189_15	53_15	1800	4.42817e+06	5.3244e+06	12.2986	2.38898	23	6522.69	0.173605
114_16	53_16	1800	4.42975e+06	5.32353e+06	0	2.38898	22	8290.02	0.173825
189_16	53_16	1800	4.42817e+06	5.3244e+06	12.2986	2.38898	23	6522.69	0.173605
166_17	NUEVA_17	1800	4.40842e+06	5.28586e+06	35.1969	2.38483	7.46219	3569.15	0.144445
104_17	42_17	1800	4.42032e+06	5.32657e+06	21.3428	2.38434	6.46486	1964.84	0.167779
77_15	54_15	1800	4.42888e+06	5.32843e+06	13.8552	2.37759	23	6795.24	0.178857
83_15	54_15	1800	4.42815e+06	5.32679e+06	14.1352	2.37759	23	5935.56	0.179289
77_16	54_16	1800	4.42888e+06	5.32843e+06	13.8552	2.37759	23	6795.24	0.178857
83_16	54_16	1800	4.42815e+06	5.32679e+06	14.1352	2.37759	23	5935.56	0.179289
124_17	4_17	1800	4.42674e+06	5.31547e+06	0	2.37524	3.54704	6592.64	0.160841
174_15	55_15	1800	4.43156e+06	5.30699e+06	0	2.36027	15	11201.5	0.149684
174_16	55_16	1800	4.43156e+06	5.30699e+06	0	2.36027	15	11201.5	0.149684
120_17	37_17	1800	4.4242e+06	5.31783e+06	0	2.3433	1.7768	3288.66	0.16527
217_17	37_17	1800	4.42493e+06	5.31947e+06	0	2.33623	3.02776	3922.79	0.16272
177_15	57_15	1800	4.41187e+06	5.29334e+06	15.765	2.31681	15	2658.69	0.141534
178_15	57_15	1800	4.41295e+06	5.29209e+06	15.765	2.31681	15	4303.93	0.138504
177_16	57_16	1800	4.41187e+06	5.29334e+06	15.765	2.31681	15	2658.69	0.141534
178_16	57_16	1800	4.41295e+06	5.29209e+06	15.765	2.31681	15	4303.93	0.138504
130_17	44_17	1800	4.44155e+06	5.28072e+06	39.926	2.30769	3.53338	41.95	0.157107
187_17	NUEVA_2017_17	1800	4.39419e+06	5.29185e+06	24.1668	2.30186	10.0531	2501.58	0.138077
66_17	412_17	1800	4.42445e+06	5.33457e+06	21.2404	2.27114	2.25051	1959.88	0.184498
147_17	55_17	1800	4.43156e+06	5.30699e+06	0	2.24237	3.16874	11199.6	0.149684
99_17	53_17	1800	4.42974e+06	5.32352e+06	0	2.2276	2.77136	8291	0.173825
113_15	53_15	1800	4.43131e+06	5.32264e+06	0	2.2059	22	6502.79	0.17437
113_16	53_16	1800	4.43131e+06	5.32264e+06	0	2.2059	22	6502.79	0.17437
216_17	377_17	1800	4.42166e+06	5.31275e+06	0	2.19795	2.67226	6110.02	0.145054
101_17	48_17	1800	4.42459e+06	5.32556e+06	24.5971	2.12375	2.69528	2809.55	0.172909
188_15	48_15	1800	4.423e+06	5.3264e+06	21.3428	2.10052	21	1030.82	0.173976
188_16	48_16	1800	4.423e+06	5.3264e+06	21.3428	2.10052	21	1030.82	0.173976
160_17	48_17	1800	4.42299e+06	5.32639e+06	21.3428	2.10052	2.69528	1032.56	0.173976
214_17	42_17	1800	4.41501e+06	5.32567e+06	21.9074	2.08789	3.04314	2470.63	0.165562
148_17	55_17	1800	4.43312e+06	5.3061e+06	0	2.02742	5.28013	11246.3	0.148929
120_15	100_15	1800	4.41827e+06	5.29354e+06	23.2416	2.00131	14	7189.41	0.147609
121_15	100_15	1800	4.41647e+06	5.29352e+06	23.2416	2.00131	14	6401.81	0.145527
120_16	100_16	1800	4.41827e+06	5.29354e+06	23.2416	2.00131	14	7189.41	0.147609
121_16	100_16	1800	4.41647e+06	5.29352e+06	23.2416	2.00131	14	6401.81	0.145527
137_17	16_17	1800	4.43205e+06	5.3008e+06	0	1.99624	5.33386	6714.21	0.152134
62_17	46_17	1800	4.41017e+06	5.32667e+06	10.9537	1.99071	2.05768	2736.17	0.169645
78_17	54_17	1800	4.43233e+06	5.33471e+06	13.8552	1.96483	3.00714	3100.38	0.193165
105_17	100_17	1800	4.41827e+06	5.29354e+06	23.2416	1.96322	3.15841	7189.41	0.147609
111_17	33_17	1800	4.40399e+06	5.29037e+06	20.8219	1.95418	5.19424	2485.93	0.155149
110_17	33_17	1800	4.40276e+06	5.28913e+06	25.8787	1.9458	3.74329	752.81	0.156329
220_17	100_17	1800	4.41477e+06	5.29306e+06	23.2416	1.94441	8.04366	5157.14	0.137095
133_17	16_17	1800	4.43173e+06	5.30425e+06	0	1.94132	2.4346	8932.74	0.140127
17_17	299_17	1800	4.42836e+06	5.25955e+06	33.4138	1.94126	5.67009	1659.68	0.154494
123_17	4_17	1800	4.42561e+06	5.31406e+06	0	1.93082	2.45277	6583.16	0.150261
102_17	42_17	1800	4.41677e+06	5.32603e+06	25.966	1.9056	3.68381	4266.81	0.169101
98_17	53_17	1800	4.43132e+06	5.32265e+06	0	1.89326	3.08715	6500.02	0.17437
6_17	N5_17	1800	4.40348e+06	5.26274e+06	34.523	1.7842	3.11838	2497.63	0.150856
222_17	1_17	1800	4.41368e+06	5.32772e+06	21.9074	1.65435	2.73848	2637.09	0.162549
106_17	100_17	1800	4.41644e+06	5.29358e+06	23.2416	1.53621	3.85992	6352.05	0.145345
188_17	NUEVA_2017_17	1800	4.39516e+06	5.29034e+06	24.1668	1.33882	3.56252	1581.28	0.149654
